# Supplementary material
Source: publisher figshare collection journal article supplement (https://asha.figshare.com/articles/dataset/_/25564461)
Supplement: Supplementary file 1 [file 1]

**Supplemental Material S4.** FEMAT-English-US to -UK Adaptations.

| FEMAT Content                 | Adaptations     |                 |                                                                                     |                                                                                                            |
|-------------------------------|-----------------|-----------------|-------------------------------------------------------------------------------------|------------------------------------------------------------------------------------------------------------|
|                               | Record Form     |                 | Materials Packet                                                                    |                                                                                                            |
|                               | US Version      | UK Version      | US Version                                                                          | UK Version                                                                                                 |
| Required Materials            | “-ize” spelling | “-ise” spelling | *                                                                                   |                                                                                                            |
| Screening Directions          | *               |                 | *                                                                                   |                                                                                                            |
| Screening Task A              | *               |                 | *                                                                                   |                                                                                                            |
| Screening Task B              | *               |                 | *                                                                                   |                                                                                                            |
| Screening Task C              | *               |                 |                                                                                     | <i>recorded in UK dialect</i>                                                                              |
| Screening Task D              | *               |                 | *                                                                                   |                                                                                                            |
| Administration Tips           | “-ize” spelling | “-ise” spelling | *                                                                                   |                                                                                                            |
| Administration Directions     | “-ize” spelling | “-ise” spelling | *                                                                                   |                                                                                                            |
| Item #1                       | *               |                 | *                                                                                   |                                                                                                            |
| Item #2<br>(Voicemail Script) | *               |                 | on behalf of<br>Dr. Morales<br>scheduled<br>November 15 <sup>th</sup><br>reschedule | from<br>Dr. Morris<br>booked<br>15 <sup>th</sup> of November<br>rearrange<br><i>recorded in UK dialect</i> |

|                                  |                  |                        |                                                                                  |                                                                                                                                       |
|----------------------------------|------------------|------------------------|----------------------------------------------------------------------------------|---------------------------------------------------------------------------------------------------------------------------------------|
| Item #3<br>(Voicemail Questions) | Dr. Morales      | Dr. Morris             | *                                                                                |                                                                                                                                       |
| Item #4 (Invitation)             | *                |                        | Pittsburgh, PA 15223                                                             | Bristol BS8 1RA                                                                                                                       |
| Item #5<br>(Video Script)        | store            | shop                   | “-or” spelling<br>I need you to<br>fast<br>Myrtle<br>swimsuit<br>coupon<br>store | “-our” spelling<br>please can you<br>quickly<br>Brighton<br>swimming shorts<br>discount code<br>shop<br><i>recorded in UK dialect</i> |
| Item #6<br>(Video Questions)     | size<br>swimsuit | age<br>swimming shorts | *                                                                                |                                                                                                                                       |
| Item #7 (Bill)                   | *                |                        | Jane Doe 123 North<br>Street New York, NY<br>12345<br>Credit Card Company        | John Smith 15 Amberly<br>Drive Bristol BS15 7PT<br><br>SunTrust Bristol                                                               |
|                                  |                  |                        | Account Number: 0000-3450-9876-1230                                              | Customer Number: 0033881313-03                                                                                                        |
|                                  |                  |                        |                                                                                  | <i>The entire design of the bill was revised to match a UK credit card company.</i>                                                   |
| Item #8 (Medication)             | “-ize” spelling  | “-ise” spelling        | 100 Discovery Blvd.<br>Newark, DE<br>Store #: (302) 555-4321                     | 1 Summer Lane Bristol<br>BS8 1RA<br>Phone No: 0 117 987 6543                                                                          |
| Item #9                          | *                |                        | *                                                                                |                                                                                                                                       |

|                                  |                 |                           |   |
|----------------------------------|-----------------|---------------------------|---|
| Item #10                         | *               |                           | * |
| Item #11                         | *               |                           | * |
| Item Response Summary            |                 | added “in the shaded box” | * |
| Response Graphical Summary       | “-ize” spelling | “-ise” spelling           | * |
| Compensation Information Summary | “-ize” spelling | “-ise” spelling           | * |

*Note.* \*No change.
