# Supplementary material
Source: publisher figshare collection journal article supplement (https://asha.figshare.com/articles/dataset/_/25564461)
Supplement: Supplementary file 1 [file 1]

## Sheet: reconciliation report
Supplemental material, Saylor et al., "Cultural Adaptation of the Functional External Memory Aid Tool for Use in the United Kingdom and Australia," Perspectives, https://doi.org/10.1044/2024_PERSP-23-00261
Supplemental Material S1. AU linguistic validation.
Location of Item	Source Language (Country and version)	Concept Definition	If DIALECT (Localization of Dialect)	Forward TR1 NEW LANGUAGE	Forward TR2 NEW LANGUAGE	Reconciliation of Forward Translation by (Name)	Resolution Reasoning	Back Translation - 1	Back Translation - 2	Resolution Reasoning
Record Form Page 1	Functional External Memory Aid Tool Record Form		AU	No change	no change
	Client; Educational Level; Age; Client Current Living Situation; Examiner; Administration Date		AU	No change	no change
	Required FEMAT Materials: Administration requires materials, some of which are provided online by the test developers. Others will need to be supplied by the examiner.		AU	No change	no change
	Online Materials from Developer: Screening packet (.pdf) FEMAT Record Form (.pdf) FEMAT Materials Packet (.pdf) Item #5 Video Message (.mov) Item #2 Audio Message (.m4a) Screening Audio Message (.m4a)		AU	No change	no change
	Materials Provided by the Examiner: Pen or pencil (for examiner and client) Calendar for the current year Timer Notepad Sticky Notes Medication Organizer Dry-erase marker (if desired) Pill Bottles Small candies to mimic pills Device with speaker (e.g., smartphone)		AU	Pen or pencil (for examiner and client) Calendar for the current year Timer Notepad Sticky Notes Medication Organizer Whiteboard marker (if desired) Pill Bottles Small beads or lollies to mimic pills Device with speaker (e.g., smartphone)	Post-it (for Sticky); Whiteboard marker (for dry-erase marker); lollies (for candies)			keep whiteboard as is, delete "or lollies" and just have "small beads to mimic pills"	change back to "dry-erase marker", delete "or lollies"
	The icons to the right of the stated materials are used on pages 2-9 to indicate when the specific material is needed for the item administration. Please note, this does not include optional items that may be used as an external aid (e.g., calendar, notepad).		AU	No change	no change
Record Form Page 2	Administer the screening tasks in alphabetical order. These tasks are not scored but provide insight into how the client's sensory and motor skills may affect their ability to interact with the FEMAT stimuli. Say, During the upcoming tasks, I will be showing you various materials. Before we get started, I want to make sure that you can see and hear things adequately through the computer. If you n…		AU	Say, During the following tasks, I will be showing you various materials. Before we get started, I want to make sure that you can see and hear things adequately through the computer. If you need me to make text bigger or adjust volume, please let me know now.	no change			no changes	no changes
	Task A: Vision Present Screening Packet pg. 2, say, Please name each letter as I point to it. Point to each letter, one at a time. Note the smallest font size. - Small Font - Medium Font - Large Font		AU	No change	no change
Materials Page 2	Vision Screening (page 2)		AU	No change	no change
Record Form Page 2	Task B: Reading Present Screening Packet pg. 3, say, Please read the sentence in the smallest font that you are able. Point to each sentence, one at a time. Note smallest font size. - Small Font - Medium Font - Large Font		AU	No change	no change
Materials Page 2	Reading Screening (page 2)		AU	No change	no change
Record Form Page 2	Task C: Hearing Present Screening Audio Message, say, Please repeat back what you hear. Increase volume level as needed and note appropriate volume level. - Acceptable - Poor		AU	No change	no change
Google Folder	Hearing Screening Audio		AU	No change	no change (?accent change)
Record Form Page 2	Task D: Writing Present client with a blank piece of paper and pen/pencil, say, Please write the sentence: It is raining cats and dogs outside. Note legibility. - Legible - Illegible		AU	No change	no change
	Screening Observations		AU	No change	no change
Record Form Page 3	Administration Tips: - Before Administration: - - Before administering FEMAT items, ensure you have chosen the stimuli size and volume level that best supports the client's sensory needs. - - Administration directions may be repeated up to three times. - - - Directions may be modified to include a more specific word for any item on the table. - - - It is important to emphasize that the client can…		AU	Administration Tips: - Before Administration: - - Before administering FEMAT items, ensure you have chosen the stimuli size and volume level that best supports the client's sensory needs. - - Administration directions may be repeated up to three times. - - - Directions may be modified to include a more specific word for any item on the table. - - - It is important to emphasise that the client can…	no change			change spelling to "emphasize" and change carer to "caregiver"	"emphasise" to "emphasize"; "carer" to "caregiver"
	- During Administration: - - Item prompts can be repeated once if requested by the client or if the directions are not understood. - - Examiners are encouraged not to ask follow-up questions until all items have been administered. - - Further prompts are permitted to clarify any unclear or incomplete client responses. - - - In this case, the examiner should check the box with the icon. - - If a c…		AU	- During Administration: - - Item prompts can be repeated once if requested by the client or if the directions are not understood. - - Examiners are encouraged not to ask follow-up questions until all items have been administered. - - Further prompts are permitted to clarify any unclear or incomplete client responses. - - - In this case, the examiner should tick the box with the icon. - - If a cl…	carer (for caregiver)			change tick to "check"	"tick" to "check"
	After Administration: - Use pages 10-12 to summarize responses and performance during administration.		AU	After Administration: - Use pages 10-12 to summarise responses and performance during administration.	no change			change summarise to "summarize"	"summarise" to "summarize"
Record Form Page 4	Administration Directions: Place all materials in front of the client. Say, I'm going to ask you to role play through several everyday tasks. Please feel free to use anything on the table or that you brought with you today to help complete the tasks. In front of you there is a calendar, timer, notepad, and a medication organizer. Gesture to each item as you label it. Say, You can use any of these…		AU	Administration Directions: Place all materials in front of the client. Say, I'm going to ask you to role play through several everyday tasks. Please feel free to use anything on the table or that you brought with you today to help complete the tasks. In front of you there is a calendar, timer, notepad, and a medication organiser. Gesture to each item as you label it. Say, You can use any of these…	no change				keep "role play through several"; "organiser" to "organizer"
	1. "Pretend you just put a cake in the oven. Show me how you would remember to take the cake out of the oven in 10 minutes."		AU	No change	no change
	0-No Response / 1-Verbally explained they would use an external aid/ 2-Attempted to use an external aid to complete task / 3-Accurately used an external aid to complete task		AU	No change	no change
Record Form Page 5	2. "I am going to play a voicemail for you and ask you some questions about the voicemail immediately afer it stops. The voicemail is about an upcoming appointment."		AU	2. "I am going to play a recorded voicemail message for you and ask you some questions about the voicemail message immediately afer it stops. The voicemail message is about an upcoming appointment."	no change			recorded - no change, delete message throughout and just use "voicemail"	keep "recorded"; delete "message" 3x
	0-No attempt to use an external aid / 1-Attempted to use an external aid / 2-Wrote/typed some of the bold words from voicemail script / 3-Accurately wrote/typed all five bold words from the voicemail script		AU	No change	no change
Google Folder	2. Stimuli - Voicemail		AU	As below	4pm; early (for 'in advance')
Materials Page 3	2. Stimuli - Voicemail Script (page 3)		AU	Hi, my name is Sarah, and I am calling from Dr Martin’s office. You have a cardiac appointment scheduled for November 15th at 4pm. Please bring a list of your medications with you to the appointment. Also, please arrive 30 minutes before the appointment time to complete your paperwork for the appointment. If you need to reschedule, please give us a call. Thank you and we look forward to your visi…	4pm; early	Also, please arrive 30 minutes early to complete your paperwork for the appointment.		no changes	no changes
Record Form Page 5	3. "Now I would like you to answer some questions about details from the voicemail." (Hand the Doctor's Appointment form and pen to the participant)		AU	3. "Now I would like you to answer some questions about details from the voicemail message." (Hand the Doctor's Appointment form and pen to the participant)	no change				delete "message"
	0-No accurate facts documented / 1-Accurately answered one-two questions / 2-Accurately answered three-four questions / 3-Accurately answered five questions /		AU	No change	no change
Materials Page 4	3. Stimuli - Voicemail Questions (page 4)		AU	This form is about the information you heard from the voicemail message just played. Please complete the form below to the best of your ability.	no change			delete message	delete "message"
Record Form Page 6	4. "You just received an invitation to an upcoming party (gesture to the paper invitation). Show me how you would remember the details of the invitation."		AU	No change	no change
	0-No attempt at task or mention of external aid/ 1-Verbally explained they would use an external aid / 2-Attempted to use an external aid to remember key components / 3-Accurately used an external aid to remember key components		AU	No change	no change
Materials Page 5	4. Stimuli - Invitation (page 5)		AU	You are invited to an Engagement Party Friday, February 22 at 6:30pm Hosted by the Arnold Family The Small Galley 11 Winter Road Castlemaine, VIC 3450	Newcastle, NSW, 2267			change address to a US city/state	change address to US location (city, state ZIP)
Record Form Page 6	5. "A family member just left you a video message asking you to buy something for her next time you are at the store. I am going to ask you some questions about the message after I play it." (play video)		AU	5. "A family member just left you a video message asking you to buy something for her next time you are at the shops. I am going to ask you some questions about the message after I play it." (play video)	shops (for store)			change shops to "store"	"shops" to "store" or "next time you are out shopping"
	0-No attempt at task or mention of external aid / 1-Attempted to use an external aid during the task / 2-Wrote/typed some of the bold words from video script / 3-Accurately wrote/typed all five bold words from the video script		AU	No change	no change
Google Folder	5. Stimuli - Video Message		AU	As below	he is a small; pair of bathers:voucher for the shop
Materials Page 6	5. Stimuli - Video Message Script (page 6)	Myrtle is a common beach destination for families to go on vacation.	AU	“Hi! Hope you’re well. I need you to do me a favour and pick up some things for Jacob. He is growing so fast and needs some new beach clothes for our trip to the Gold Coast. He wears size 12. It would be great if you could pick out some bathers and a t-shirt for him. I am going to email you a gift voucher for the shop. We need the clothes by Thursday next week. Thank you so much!”	Hope all’s well; Would you mind doing me a favour and getting some clothes for Jacob; stuff; he is a small [if numeracy is being assessed, if so change to 'size 30']; pair of bathers and a top [as per video version, i.e. not 'swimsuit with a shirt']; voucher for the shop; the clothes			hope youre well - no change, change favour to "favor" spelling, beach clothes can stay the same, change the Gold Coast to a typial US vaation beach such as Myrtle Beach, change pick out some bather and a t-shirt to "pick out a bathing suire and a t-shirt" and change a gift voucher for the shop to "a gift card for the store" or a "coupon for the store", can keep Thursday next week	"Hope you're well" to "Hope you're doing well"; "favour" to "favor"; keep "beach clothes"; change "Gold Coast" to a US location; change "some bathers" to "a bathing suit"; "gift voucher for the shop" to "gift card to the store"; change "Thursday next week" to "next Thursday"
Record Form Page 7	6. "Now I would like you to answer some questions about the facts from the message." (Hand the Video Message form and pen to the participant)		AU	No change	(in Answers) bathers (for swimsuit)
	0-No accurate facts retrieved / 1-Accurately answered one-two questions / 2-Accurately answered three-four questions / 3-Accurately answered five questions		AU	No change	no change
Materials Page 7	6. Stimuli - Video Message Questions (page 7)		AU	No change	no change
Record Form Page 7	7. "You just opened a new credit card and received the first bill. (gesture to the bill). On the bill is the due date, and amount due. Show me how you would remember to pay the bill on time."	"Opening a new credit card" is to apply for, sign up, and create an account with a new credit card company	AU	7. "You just opened a took out new credit card and received the first statement. (gesture to the statement). On the statement is the due date, and amount due. Show me how you would remember to pay this bill on time."	took out (for opened); statement (for bill); credit card statement (for bill); statement (for bill); statement (for bill); statement type (for bill type)			delete took out, can keep the rest. maybe use bill instead of statement, but I think statement works too	delete "took out"; no other changes
	0-No response or mention of external aid / 1-Verbally explained they would use an external aid / 2-Attempted to use an external aid to remember key components/ 3-Accurately used an external aid to remember key components		AU	bpay	bpay (for autopay)			change to an american company	change to American company
Materials Page 8	7. Stimuli - Bill (page 8)		AU	Address, date, & labelling formatting updated in materials.	Credit Card Statement (for Bill); Melbourne, VIC, 3000; Sydney, NSW, 2000; 150260 [6 digit number]; 15/4/22; limit; 31/4/22			change address to american address, change "closing balance" to "current balance" and change date to american formatting day/month/year	change addresses to American addresses; "closing balance" to "current balance"; change dates to 05/14/22 and 04/31/22
Record Form Page 8	8. "You just filled a new prescription from your doctor. Show me how you would remember to take these two medications."	You will have called the pharmacy, indicated online, or dropped off your prescription for a pharmacist to complete your prescription.	AU	Say, You just filled a new prescription from your doctor. Gesture to pill bottles and pill organiser. Say, Show me how you would remember to take these two medications.	no change			change organiser to "organizer"	"organiser" to "organizer"
	0-No response of mention of external aid / 1-Verbally explained they would use an external aid / 2-Attempted to use an external aid to sort/remember medications / 3 - Accurately used an external aid to sort/remember medications		AU	No change	no change
Materials Page 9	8. Stimuli - Prescriptions (page 9)		AU	Address & phone formatting updated in materials.	Rd; (08) 9555-4321 [include two-digit calling code and 8-digit number preceded by 9 or 8]; Rd [for Blvd], Albany, WA			change address to american address and change phone number to xxx-xxx-xxxx format	change address to American address; change phone number to american format
Record Form Page 8	9. "I am going to set a timer for two minutes. (Set timer for two minutes. Ensure the volume is up.) When the timer goes off, you to remind me to tell Amanda to call the insurace company before 5:00."		AU	No change	no change
	0-No attempt to use an external aid / 1-Attempted to use an external aid during the task / 2-Wrote/typed some of the underlined phrases / 3-Accurately wrote/typed all of the underlined phrases		AU	No change	no change
Record Form Page 9	10. You received an email that your prescription will be ready for pickup tomorrow at 3:30 (gesture to email). Show me how you would remember to pick up your medication on time."		AU	No change	no change
	0-No attempt at task or mention of external aid/ 1-Verbally explained they would use an external aid / 2-Attempted to use an external aid to document key components / 3-Accurately used an external aid to document key components		AU	No change	no change
Materials Page 10	10. Stimuli - Email (page 10)		AU	No change	no change
Record Form Page 9	11. (Timer goes off). "What did you need to remind me to do?"		AU	No change	no change
	0-No attempt at task or mention of external aid/ 1-Attempted task with inaccurate information / 2-Attempted task with some of the correct phrases / 3-Accurately recalled all correct phrases		AU	No change	no change
Record Form Page 10	FEMAT Item Response Summary Record each individual item score in the following table to calculate category and FEMAT total scores, as indicated below. - Category Total (sum of shaded items) - FEMAT Total (sum of all items)		AU		no change
Record Form Page 11	FEMAT Response Graphical Summary Summarize the different response types and prompts given during the FEMAT administration by totaling the number of each response type. Use the following space to illustrate it below. - No response/Attempt - Verbal description - Attempted strategy use - Successful strategy use - Prompts given		AU	FEMAT Response Graphical Summary Summarise the different response types and prompts given during the FEMAT administration by totaling the number of each response type. Use the following space to illustrate it below. - No response/Attempt - Verbal description - Attempted strategy use - Successful strategy use - Prompts given	no change			change summarise to "summarize"	"summarise" to "summarize"
Record Form Page 12	FEMAT Compensation Information Summary Use the following page to summarize information about the client's compensation use and preferences. - Use of external aids - - Did not use any external aids - - Used external aids (calendar, timer/alarm, medication system, note-taking system, other) - - - Described use/ inaccurate use/ inconsistent performance / Accurate Use		AU	FEMAT Compensation Information Summary Use the following page to summarise information about the client's compensation use and preferences. - Use of external aids - - Did not use any external aids - - Used external aids (calendar, timer/alarm, medication system, note-taking system, other) - - - Described use/ inaccurate use/ inconsistent performance / Accurate Use	no change			change summarise to "summarize"	"summarise" to "summarize"
	Preferences - Appearance (size, layout, design) - Technology (high-tech, low-tech, no-tech) - Tasks (finances, medication, shopping, appointments)		AU	No change	no change
	Starting Point for Training - Unfamiliar with external aid - Provide awareness training on use of external aid - Provide training to use external aid - Provide adaptation training - Educate family - Educate care partners		AU	No change	carers (for care partners)
