# Supplementary material
Source: publisher figshare collection journal article supplement (https://asha.figshare.com/articles/dataset/_/25564461)
Supplement: Supplementary file 2 [file 1]

**Supplemental Material S3. FEMAT-English-US to -AU adaptations.**

| FEMAT Content                 | Adaptations              |                                 |                             |                               |
|-------------------------------|--------------------------|---------------------------------|-----------------------------|-------------------------------|
|                               | Record Form              |                                 | Materials Packet            |                               |
|                               | US Version               | AU Version                      | US Version                  | AU Version                    |
| Required Materials            | “-ize” spelling          | “-ise” spelling                 | *                           |                               |
|                               | sticky notes             | Post-it notes                   |                             |                               |
|                               | dry-erase                | whiteboard                      |                             |                               |
|                               | candies                  | lollies                         |                             |                               |
| Screening Directions          | upcoming                 | following                       | *                           |                               |
| Screening Task A              | *                        |                                 | *                           |                               |
| Screening Task B              | *                        |                                 | *                           |                               |
| Screening Task C              | *                        |                                 |                             | <i>recorded in AU dialect</i> |
| Screening Task D              | *                        |                                 | *                           |                               |
| Administration Tips           | “-ize” spelling          | “-ise” spelling                 | *                           |                               |
|                               | check                    | tick                            |                             |                               |
|                               | caregiver                | carer                           |                             |                               |
| Administration Directions     | “-ize” spelling          | “-ise” spelling                 | *                           |                               |
| Item #1                       | *                        |                                 | *                           |                               |
| Item #2<br>(Voicemail Script) | voicemail<br>Dr. Morales | voicemail message<br>Dr. Martin | on behalf of<br>Dr. Morales | from<br>Dr. Martin            |

|                                      |                 |                     |                                                                                                                                                                                                     |                                                                                                                                                                                                                                  |
|--------------------------------------|-----------------|---------------------|-----------------------------------------------------------------------------------------------------------------------------------------------------------------------------------------------------|----------------------------------------------------------------------------------------------------------------------------------------------------------------------------------------------------------------------------------|
|                                      | medication list | list of medications | 4 o'clock<br>medication list<br>in advance<br>call us                                                                                                                                               | 4PM<br>list of medications<br>before the appointment<br>time<br>give us a call<br><i>recorded in AU dialect</i>                                                                                                                  |
| Item #3<br>(Voicemail Questions)     | voicemail       | voicemail message   | voicemail                                                                                                                                                                                           | voicemail message                                                                                                                                                                                                                |
|                                      | Dr. Morales     | Dr. Martin          |                                                                                                                                                                                                     |                                                                                                                                                                                                                                  |
|                                      | medication list | list of medications |                                                                                                                                                                                                     |                                                                                                                                                                                                                                  |
| Item #4<br>(Invitation)              | *               |                     | Pittsburgh, PA 15223                                                                                                                                                                                | Castlemaine, VIC 3450                                                                                                                                                                                                            |
| Item #5 (Video<br>Message Script)    | store           | shops               | “-or” spelling<br>I hope everything is<br>going well with you<br>clothes for our beach trip<br>to Myrtle<br>pick him out a swimsuit<br>with a shirt<br>coupon to the store<br>Thursday of next week | “-our” spelling<br>Hope you're well<br><br>beach clothes for our trip to<br>the Gold Coast<br>pick out some bathers and<br>a t-shirt for him<br>gift voucher for the shop<br>Thursday next week<br><i>recorded in AU dialect</i> |
| Item #6 (Video<br>Message Questions) | swim suit       | bathers             | Who is the outfit for?<br>When do you need to<br>buy the outfit by?                                                                                                                                 | Who are the clothes for?<br>When will the clothes be<br>needed?                                                                                                                                                                  |
| Item #7 (Bill)                       |                 |                     | Credit Card Company<br>Los Angeles, CA 90210<br>New York, NY 12345<br>new balance                                                                                                                   | Westpac<br>Melbourne, VIC 3000<br>Caulfield, VIC 3162<br>closing balance                                                                                                                                                         |

|                                     |                               |                                              |                                                                                                                                            |                                                                                                                                    |
|-------------------------------------|-------------------------------|----------------------------------------------|--------------------------------------------------------------------------------------------------------------------------------------------|------------------------------------------------------------------------------------------------------------------------------------|
|                                     | bill<br><br>opened<br>autopay | credit card<br>statement<br>took out<br>bpay | your minimum payment<br>5/14/22; 4/31/22<br>total credit line<br>total credit available<br>statement closing date<br>days in billing cycle | minimum payment due<br>14/05/22; 31/04/22<br>credit limit<br>available credit<br>statement to<br>no. of days in statement<br>cycle |
| Item #8 (Medication)                | “-ize” spelling               | “-ise” spelling                              | 100 Discovery Blvd.<br>Newark, DE<br>store #: (302) 555-4321                                                                               | 100 Discovery Drive,<br>Wangaratta, NSW<br>phone: (02) 9876 5432                                                                   |
| Item #9                             | *                             |                                              | *                                                                                                                                          |                                                                                                                                    |
| Item #10 (Prescription<br>Email)    | *                             |                                              | *                                                                                                                                          |                                                                                                                                    |
| Item #11                            | *                             |                                              | *                                                                                                                                          |                                                                                                                                    |
| Item Response<br>Summary            | *                             |                                              | *                                                                                                                                          |                                                                                                                                    |
| Response Graphical<br>Summary       | “-ize” spelling               | “-ise” spelling                              | *                                                                                                                                          |                                                                                                                                    |
| Compensation<br>Information Summary | “-ize” spelling               | “-ise” spelling                              | *                                                                                                                                          |                                                                                                                                    |

Note. \*No change.
